# Supplementary material for: Public release of hospital quality data for referral practices in Germany: results from a cluster-randomised controlled trial
Source: Springer Nature journal article supplement (doi:10.1186/s13561-017-0171-5), 2017-09-26
Supplement: MOESM1 [file 15088036]

# Local clinic ranking

## Gallbladder Removal

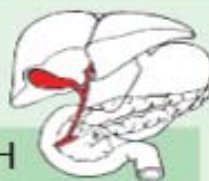

1

Waldkrankenhaus St. Marien gGmbH  
Klinikum Neumarkt  
Universitätsklinikum Erlangen  
St. Theresien-Krankenhaus Nürnberg GmbH

2

Klinikum Nürnberg Nord  
Klinikum Fürth  
St. Anna Krankenhaus Sulzbach-Rosenberg  
Klinik Hallerwiese (Nürnberg)  
Kliniken d. Ldk. Neustadt a.d. Aisch -  
Bad Windsheim (Standort Neustadt a.d. Aisch)  
Kreisklinik Roth  
ANregiomed Klinikum Ansbach  
310klinik GmbH (Nürnberg)\*  
Clinic Neuendettelsau\*  
Sana Klinik Pegnitz GmbH\*  
Stadtkrankenhaus Schwabach gGmbH\*

3

Kliniken Altmühlfranken Weißenburg  
Klinikum Forchheim  
Sozialstiftung Bamberg  
Krankenhaus Martha-Maria Nürnberg  
Kliniken Dr. Erler gGmbH (Nürnberg)\*  
Kreiskrankenhaus St. Anna Höchstadt a. d. A.\*

4

Steigenwaldklinik Burgebrach  
Schön Klinik Nürnberg Fürth\*

5

Krankenhäuser Nürnberger Land (KH Lauf)

### Excluded due to low/missing number of cases:

Sana Klinik Nürnberg GmbH  
Krankenhäuser Nürnberger Land (KH Altdorf)  
Krankenhäuser Nürnberger Land (KH Hersbruck)  
Cnopf'sche Kinderklinik (Klinik Hallerwiese  
Nürnberg)  
Klinikum Nürnberg Süd

\* Number of cases below average

# Performance of local clinics

| Clinics                                                       | Medical quality information                                                                      |                                      | number of cases <sup>1</sup> | patients' recommendation rate |
|---------------------------------------------------------------|--------------------------------------------------------------------------------------------------|--------------------------------------|------------------------------|-------------------------------|
|                                                               | Number of unremarkable indicators from German external quality assurance (4 indicators in total) | Insurance claims data (routine data) |                              |                               |
| 310Klinik GmbH (Nürnberg)                                     | all unremarkable                                                                                 | average quality                      | -                            | 95 %                          |
| ANregiomed Klinikum Ansbach                                   | all unremarkable                                                                                 | average quality                      | 0                            | 80 %                          |
| Clinic Neuendettelsau                                         | all unremarkable                                                                                 | average quality                      | -                            | 85 %                          |
| Cnopfsche Kinderklinik (Klinik Hallerwiese Nbg.)              | all unremarkable                                                                                 | number of cases too low to report    | not specified                | insuff. no. of ratings        |
| Klinik Hallerwiese (Nürnberg)                                 | all unremarkable                                                                                 | average quality                      | 0                            | 88 %                          |
| Kliniken d. Ldkr. Neustadt a.d. A. Bad Windsheim <sup>2</sup> | all unremarkable                                                                                 | average quality                      | 0                            | 82 %                          |
| Kliniken Dr. Erler gGmbH (Nürnberg)                           | 3 out of 4 unremarkable                                                                          | average quality                      | -                            | 91 %                          |
| Kliniken Altmühlfranken Weißenburg                            | all unremarkable                                                                                 | below average                        | +                            | 81 %                          |
| Klinikum Forchheim                                            | all unremarkable                                                                                 | below average                        | +                            | 81 %                          |
| Klinikum Fürth                                                | all unremarkable                                                                                 | average quality                      | +                            | 79 %                          |
| Klinikum Neumarkt                                             | all unremarkable                                                                                 | above average                        | +                            | 86 %                          |
| Klinikum Nürnberg Nord                                        | 3 out of 4 unremarkable                                                                          | above average                        | +                            | 80 %                          |
| Klinikum Nürnberg Süd                                         | 3 out of 4 unremarkable                                                                          | number of cases too low to report    | +                            | 80 %                          |
| Krankenhaus Martha-Maria Nürnberg                             | all unremarkable                                                                                 | below average                        | 0                            | 88 %                          |
| Krankenhäuser Nürnberger Land (KH Altdorf)                    | 2 out of 4 unremarkable                                                                          | number of cases too low to report    | 0                            | 84 %                          |
| Krankenhäuser Nürnberger Land (KH Hersbruck)                  | 2 out of 4 unremarkable                                                                          | number of cases too low to report    | 0                            | 84 %                          |
| Krankenhäuser Nürnberger Land (KH Lauf)                       | 2 out of 4 unremarkable                                                                          | below average                        | 0                            | 84 %                          |
| Kreisklinik Roth                                              | all unremarkable                                                                                 | average quality                      | 0                            | 82 %                          |
| Kreiskrankenhaus St. Anna Höchststadt a. d. A.                | all unremarkable                                                                                 | below average                        | -                            | 76 %                          |
| Sana Klinik Pegnitz GmbH                                      | all unremarkable                                                                                 | average quality                      | -                            | 81 %                          |
| Sana Klinik Nürnberg GmbH                                     | 3 out of 4 unremarkable                                                                          | average quality                      | -                            | 83 %                          |
| Schön Klinik Nürnberg Fürth                                   | 3 out of 4 unremarkable                                                                          | below average                        | -                            | 88 %                          |
| Sozialstiftung Bamberg                                        | 3 out of 4 unremarkable                                                                          | average quality                      | +                            | 79 %                          |
| St. Anna Krankenhaus Sulzbach-Rosenberg                       | all unremarkable                                                                                 | average quality                      | 0                            | 91 %                          |
| St. Theresien-Krankenhaus Nürnberg GmbH                       | all unremarkable                                                                                 | above average                        | 0                            | 84 %                          |
| Stadtkrankenhaus Schwabach gGmbH                              | all unremarkable                                                                                 | average quality                      | -                            | 76 %                          |
| Steigerwaldklinik Burgebrach                                  | 3 out of 4 unremarkable                                                                          | below average                        | +                            | 90 %                          |
| Universitätsklinikum Erlangen                                 | all unremarkable                                                                                 | average quality                      | 0                            | 86 %                          |
| Waldkrankenhaus St. Marien gGmbH                              | all unremarkable                                                                                 | average quality                      | +                            | 89 %                          |

<sup>1</sup> + number of cases above average, 0 average number of cases, - number of cases below average, <sup>2</sup> Location: Neustadt a. d. Aisch

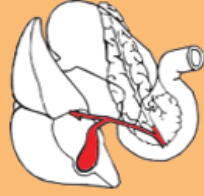

## Clinics

Stationary treatment quality  
in Nuremberg metropolitan area  
Gallbladder Removal

2014

| Quality Indicator - abbreviation<br>Quality Indicator - serial number          | Medical Quality Information                    |                    |                                                                                          |                    | 31391<br>Q4                                                |           |
|--------------------------------------------------------------------------------|------------------------------------------------|--------------------|------------------------------------------------------------------------------------------|--------------------|------------------------------------------------------------|-----------|
|                                                                                | 220<br>Q1                                      | 50791<br>Q2        | 50824<br>Q3                                                                              |                    |                                                            |           |
| Quality Indicator - description                                                | Occlusion or transection of the main bile duct |                    | Ratio of the observed to the expected rate (O/E) of reinterventions due to complications |                    | Ratio of the observed to the expected rate (O/E) of deaths |           |
| Results (average in Germany)                                                   | 0.12                                           | 1.07               | 0.12                                                                                     |                    | 0.98                                                       |           |
| Reference Range                                                                | 0.00-0.00                                      | 0.00-3.35          | 0.00-0.00                                                                                | 0.00-0.00          | 0.00-3.24                                                  | 0.00-0.00 |
| Stöcklin GmbH (Nürnberg)                                                       | R10                                            | 0.00               | R10                                                                                      | 0.00               | R10                                                        | R10       |
| Ahrgejomed Klinikum Ansbach                                                    | R10                                            | 0.00               | R10                                                                                      | 0.00               | R10                                                        | R10       |
| Clinic Heuriedetteilsau                                                        | R10                                            | 0.22               | R10                                                                                      | 0.00               | R10                                                        | R10       |
| Croop'sche Kinderklinik (Idrenk Hallerseeview Nürnberg)                        | R10                                            | 1.27               | R10                                                                                      | 0.00               | R10                                                        | R10       |
| Klinik Hallersee (Nürnberg)                                                    | R10                                            | 0.00               | R10                                                                                      | 0.00               | R10                                                        | R10       |
| Klinik Hallersee (Nürnberg)                                                    | R10                                            | 0.93               | R10                                                                                      | 0.00               | R10                                                        | R10       |
| Kliniken des Landkreises Neustadt an der Aisch - Bad Windsheim                 | 0.00                                           | 0.00               | No data available                                                                        |                    |                                                            |           |
| Kliniken des Landkreises Neustadt an der Aisch - Bad Windsheim (Bad Windsheim) | H20                                            | 0.73               | R10                                                                                      | 0.00               | R10                                                        | R10       |
| Kliniken Dr. Effer GmbH (Nürnberg)                                             | R10                                            | 1.72               | R10                                                                                      | 0.00               | R10                                                        | R10       |
| Klinikum Altmühl/Franken Wellenberg                                            | R10                                            | 0.95               | R10                                                                                      | 0.00               | R10                                                        | R10       |
| Klinikum Forchheim                                                             | H20                                            | 0.52               | R10                                                                                      | 0.00               | R10                                                        | R10       |
| Klinikum Fürth                                                                 | R10                                            | 1.72               | R10                                                                                      | 0.00               | R10                                                        | R10       |
| Klinikum Neumarkt                                                              | H20                                            | 1.13               | R10                                                                                      | 0.00               | R10                                                        | R10       |
| Klinikum Nürnberg                                                              |                                                |                    | No data available                                                                        |                    |                                                            |           |
| Klinikum Nürnberg (Nord)                                                       | H20                                            | 0.95               | R10                                                                                      | 0.00               | U32                                                        | R10       |
| Klinikum Nürnberg (Süd)                                                        | R10                                            | 2.15 <sup>13</sup> | R10                                                                                      | 0.00 <sup>13</sup> | R10                                                        | R10       |
| Krankenhaus Martha Maria Nürnberg                                              | 0.00                                           | 2.05               | R10                                                                                      | 0.00               | R10                                                        | R10       |
| Krankenhaus Nürnberger Land GmbH                                               |                                                |                    | No data available                                                                        |                    |                                                            |           |
| Krankenhaus Nürnberger Land (Krankenhaus Altdorf)                              |                                                |                    | No data available                                                                        |                    |                                                            |           |
| Krankenhaus Nürnberger Land (Krankenhaus Herbruck)                             |                                                |                    | No data available                                                                        |                    |                                                            |           |
| Krankenhaus Nürnberger Land GmbH (Krankenhaus Lauf)                            |                                                |                    | No data available                                                                        |                    |                                                            |           |
| Klinik Roth                                                                    | H20                                            | 3.47               | H20                                                                                      | 0.00               | R10                                                        | R10       |
| Krankenklinik                                                                  | R10                                            | 0.42               | R10                                                                                      | 0.00               | R10                                                        | R10       |
| Krankenklinik St. Anna Höchststadt a. d. Aisch                                 | R10                                            | 1.63               | R10                                                                                      | 0.00               | R10                                                        | R10       |
| Sana Klinik Pegnitz GmbH                                                       | R10                                            | 2.30               | R10                                                                                      | 0.00               | R10                                                        | R10       |
| Sana Klinik Nürnberg GmbH                                                      | R10                                            | 0.00               | R10                                                                                      | 0.00               | R10                                                        | R10       |
| Sana Klinik Nürnberg Fürth                                                     | R10                                            | 0.00               | R10                                                                                      | 0.00               | R10                                                        | R10       |
| Schön Klinik Nürnberg Fürth                                                    | R10                                            | 0.00               | R10                                                                                      | 0.00               | R10                                                        | R10       |
| Sozialklinik Bamberg                                                           | R10                                            | 0.56               | R10                                                                                      | 0.00               | R10                                                        | R10       |
| St. Anna Krankenhaus St. Anna Höchststadt a. d. Aisch                          | R10                                            | 1.16               | R10                                                                                      | 0.00               | R10                                                        | R10       |
| St. Anton Krankenhaus St. Anton Rechenberg                                     | R10                                            | 0.99               | R10                                                                                      | 0.00               | R10                                                        | R10       |
| St. Theresien Krankenhaus Nürnberg gGmbH                                       | U32                                            | 0.72               | R10                                                                                      | 0.00               | R10                                                        | R10       |
| Stadtkrankenhaus Schwabach gGmbH                                               | R10                                            | 1.28               | R10                                                                                      | 0.00               | R10                                                        | R10       |
| Städtische Klinik Burgtheilach                                                 | R10                                            | 0.80               | R10                                                                                      | 0.00               | H20                                                        | R10       |
| Universitätsklinikum Erlangen                                                  | R10                                            | 0.41               | R10                                                                                      | 0.00               | R10                                                        | R10       |
| Waldrarankrankenhaus St. Marien GmbH                                           | R10                                            | 0.41               | R10                                                                                      | 0.00               | R10                                                        | R10       |





## Stationary treatment quality in Nuremberg metropolitan area Gallbladder Removal

2014

### Legend

|     |                                                                                              |                                                                              |
|-----|----------------------------------------------------------------------------------------------|------------------------------------------------------------------------------|
| A40 | Erroneous documentation will be confirmed (data validation)                                  |                                                                              |
| A41 | Notices on structural or process deficiencies                                                |                                                                              |
| A42 | No (sufficiently explanatory) reasons known for the computational discrepancy                | Ranked as qualitatively discrepant after Structured Dialogue                 |
| A99 | Other (explained in the comment)                                                             |                                                                              |
| D50 | Incomplete or erroneous documentation                                                        |                                                                              |
| D51 | Software problems caused erroneous documentation                                             |                                                                              |
| D99 | Other (explained in the comments)                                                            | Evaluation not possible due to improper documentation                        |
| H20 | Request on internal quality management to establish the analysis of calculated abnormalities |                                                                              |
| H99 | Other (explained in the commentary)                                                          | Remarkable result concerning calculations was pointed out to the institution |
| U30 | Correct documentation will be confirmed (data validation)                                    |                                                                              |
| U31 | Special clinical situation                                                                   |                                                                              |
| U32 | The deviating result explained by isolated cases                                             |                                                                              |
| U33 | No indication for medical quality faults (isolated documentation problems)                   | Quality assessment is unremarkable after structured dialog                   |
| U99 | Other (explained in the comments)                                                            |                                                                              |
| R10 | Result computationally non-discrepant, therefore no Structured Dialogue required             | Result within reference range                                                |
| N01 | Quality indicator without a result because no corresponding cases occurred                   |                                                                              |
| N02 | Reference range not defined for this indicator                                               | Evaluation not planned                                                       |
| N99 | Other (explained in the comments)                                                            |                                                                              |

#### Note:

Not highlighted cells have not been assessed as qualitatively unremarkable.  
Cells marked in yellow have been assessed as qualitatively unremarkable.  
Cells marked in grey have not been considered in the assessment.

|    |                                                                                                                                                                                                                                                         |  |
|----|---------------------------------------------------------------------------------------------------------------------------------------------------------------------------------------------------------------------------------------------------------|--|
| CI | Confidence interval                                                                                                                                                                                                                                     |  |
| SD | Structured Dialog                                                                                                                                                                                                                                       |  |
| UE | Unfavourable single-event                                                                                                                                                                                                                               |  |
| 1  | Presumably data show inconsistencies. It is presumed that Bad Windsheim is performing this service.                                                                                                                                                     |  |
| 2  | Insurance claims data are referring to Waldkrankenhaus St. Marien gGmbH as a whole.                                                                                                                                                                     |  |
| 3  | May refer to more than one hospital location.                                                                                                                                                                                                           |  |
| 4  | Refers to all hospital locations.                                                                                                                                                                                                                       |  |
| 5  | Incorrect documentation in single-events. Analysis of cases ensued. No indication for medical quality faults.                                                                                                                                           |  |
| 6  | The herein analyzed treatment was performed at Klinikum Nürnberg Süd. For single-events, patients are transferred to Klinikum Nürnberg Nord, e.g. due to comorbidities. Based on legal regulations, these patients must be shown here. Nevertheless the |  |
| 7  | The main speciality department is located at Klinikum Süd. Treatment was executed there.                                                                                                                                                                |  |
| 8  | In the meanwhile a new cardiac catheterization lab has been commissioned.                                                                                                                                                                               |  |
| 9  | Due to the commissioning of two new cardiac catheterization labs, the dosis protocols had to be adjusted.                                                                                                                                               |  |
| 10 | A significantly higher number of pressure wires (fractional coronary flow reserve) was performed to evaluate haemodynamical relevance of intermediary stenosis. Additionally a stent-enhancement-procedure was introduced.                              |  |
| 11 | No quality faults affirmed after case analysis.                                                                                                                                                                                                         |  |
| 12 | Result is not rateable qualitatively.                                                                                                                                                                                                                   |  |
| 13 | The herein analyzed treatment was performed at Klinikum Nürnberg Nord. For single-events, patients are transferred to Klinikum Nürnberg Süd, e.g. due to comorbidities. Based on legal regulations, these patients must be shown here. Nevertheless the |  |
| 14 | The main speciality department is located at Klinikum Nord. Treatment was executed there.                                                                                                                                                               |  |
